# Supplementary material
Source: PubMed Central journal article supplement (PMC3729447)
Supplement: NIHMS337991-supplement-1.pdf [file NIHMS337991-supplement-1.pdf]

Supporting Information for

Label-Free Virus Detection Using Silicon Photonic  
Microring Resonators

*Melinda S. McClellan,<sup>a</sup> Leslie L. Domier,<sup>b</sup> and Ryan C. Bailey,<sup>a,\*</sup>*

<sup>a</sup> Department of Chemistry, University of Illinois at Urbana-Champaign, 600 S. Mathews Ave,  
Urbana, Illinois, 61801

<sup>b</sup> Department of Crop Sciences, University of Illinois at Urbana-Champaign, United States  
Department of Agriculture-Agricultural Research Service, Urbana, IL 61801

\* baileyrc@illinois.edu

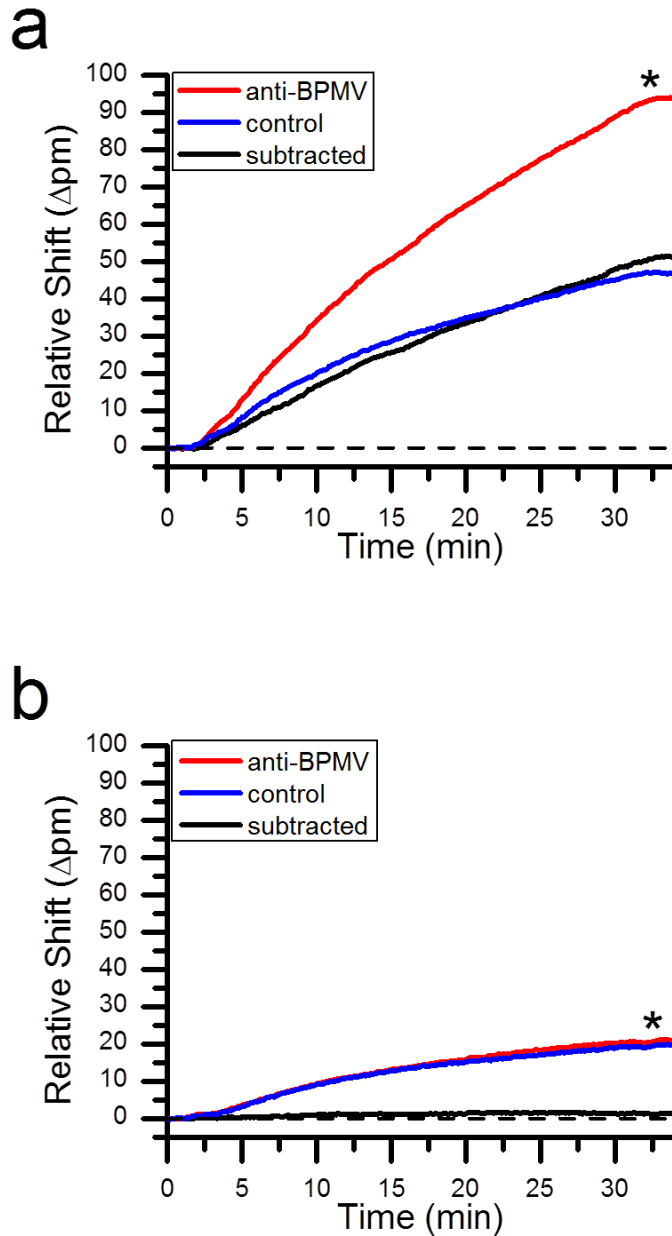

**Figure S1.** Graphs showing the response of BPMV and control sensors to the extract from a BPMV infected leaf (a) and a healthy leaf (b). The red trace is the response from anti-BPMV functionalized sensors; the blue trace is the response from control sensors; the black trace is the response from anti-BPMV functionalized sensors after correction for non-specific binding to control sensors. Samples are introduced at 2 minutes, and the \* represents a change back to pure buffer
